# Supplementary material for: Distribution and Genetic Diversity ofSalmonella entericain the Upper Suwannee River
Source: Hindawi journal article supplement (doi:10.1155/2011/461321), 2011-01-01
Supplement: f1 [file 461321.f1.zip]

Archive with 2 entries (2 files):
- 461321/461321.f1.pptx
- 461321/461321.f2.pptx
